# Supplementary material for: Implementation and Evaluation of Personal Genetic Testing As Part of Genomics Analysis Courses in German Universities
Source: Research Square preprint supplement (doi:10.21203/rs.3.rs-2324352/v1), 2022-12-20
Supplement: Supplementary file 1 [file 43c598178c96d86c5d5986ed.xlsx]

## Sheet: evolution_table
Supplement 5. Table containing comparison of questionnaire results between different questionnaires in one course year. The list is filtered to only contain p-values < 0.1.
Question	University	Course year	Comparison	Is analysis paired?	Were values binarized (long-version questionnaires)?	P-Value	Effect size	Effect size interpretation)	Responses (1: positive response; -1: negative response)
Do you plan to (Q1-Q3) or did you (Q4) conduct analyses with your own data beyond the course? Option: Carrier detection of risk variants for monogenetic diseases	TUM	WiSe 2020/21	Q1 <> Q4	FALSE	FALSE	0.014985	0.570544	large	Q1: 1, 1, 1, 1, 1, 1, 1, 1; Q4: 1, 1, -1, -1, -1, -1
Do you plan to (Q1-Q3) or did you (Q4) conduct analyses with your own data beyond the course? Option: Analyzing risk of (common) polygenic diseases	HPI	SoSe 2021	Q3 <> Q4	TRUE	FALSE	0.0196562	1	large	Q3: 1, 1, 1, 1, 1, 1; Q4: -1, -1, -1, -1, -1, -1
I want to (Q1, Q2) or did (Q3, Q4) calculate my genetic ancestry.	HPI	SoSe 2020	Q2 <> Q3	TRUE	TRUE	0.0262683	0.952579	large	Q2: 1, 1, 0, 1, 1, 1; Q3: -1, -1, -1, -1, -1, -1
I want to (Q1, Q2) or did (Q3, Q4: monogenic) assess my personal disease risk.	HPI	SoSe 2020	Q1 <> Q3	TRUE	TRUE	0.0262683	0.952579	large	Q1: 1, 1, 1, 1, 1, 0; Q3: -1, -1, -1, -1, -1, -1
I want to (Q1, Q2) or did (Q3, Q4: polygenic) assess my personal disease risk.	HPI	SoSe 2020	Q1 <> Q3	TRUE	TRUE	0.0262683	0.952579	large	Q1: 1, 1, 1, 1, 1, 0; Q3: -1, -1, -1, -1, -1, -1
Do you plan to (Q1-Q3) or did you (Q4) conduct analyses with your own data beyond the course? Option: Analyzing wellness traits (not disease-relevant, e.g., eye color or blood type)	TUM	WiSe 2020/21	Q3 <> Q4	FALSE	FALSE	0.0291375	0.535714	large	Q3: 1, 1, 1, 1, 1, 1, -1; Q4: 1, -1, -1, -1, -1, -1
I want to (Q1, Q2) or did (Q3, Q4) calculate my genetic ancestry.	HPI	SoSe 2020	Q1 <> Q3	TRUE	TRUE	0.0305448	0.927173	large	Q1: 1, 1, 1, 1, 0, 0; Q3: -1, -1, -1, -1, -1, -1
I want to (Q1, Q2) or did (Q3, Q4: monogenic) assess my personal disease risk.	HPI	SoSe 2020	Q2 <> Q3	TRUE	TRUE	0.0368884	0.912871	large	Q2: 1, 1, 1, -1, 1, 1; Q3: -1, -1, -1, -1, -1, -1
I want to (Q1, Q2) or did (Q3, Q4: polygenic) assess my personal disease risk.	HPI	SoSe 2020	Q2 <> Q3	TRUE	TRUE	0.0368884	0.912871	large	Q2: 1, 1, 1, -1, 1, 1; Q3: -1, -1, -1, -1, -1, -1
Do you plan to (Q1-Q3) or did you (Q4) conduct analyses with your own data beyond the course? Option: Analyzing pharmacogenomic markers (medication effects)	HPI	SoSe 2021	Q3 <> Q4	TRUE	FALSE	0.0368884	0.912871	large	Q3: 1, 1, 1, 1, 1, 1; Q4: 1, -1, -1, -1, -1, -1
Do you plan to (Q1-Q3) or did you (Q4) conduct analyses with your own data beyond the course? Option: Carrier detection of risk variants for monogenetic diseases	HPI	SoSe 2021	Q3 <> Q4	TRUE	FALSE	0.0368884	0.912871	large	Q3: 1, 1, 1, 1, 1, 1; Q4: -1, 1, -1, -1, -1, -1
PGT results are not predictive (I cannot be sure a condition indicated by the results will break out)	HPI	SoSe 2020	Q1 <> Q3	TRUE	TRUE	0.0477149	0.828742	large	Q1: 1, 0, 1, 0, -1, 0, NA, -1; Q3: 1, 1, 1, 1, 1, 1, 0, 0
PGT is useful to inform family members about health risks	HPI	SoSe 2020	Q2 <> Q3	TRUE	TRUE	0.0533369	0.774597	large	Q2: 1, 0, 1, 1, 1, 1, 1, -1; Q3: 0, -1, 1, -1, -1, -1, 1, -1
I see this as an opportunity to get information that would help me improve my health and wellbeing	HPI	SoSe 2020	Q2 <> Q3	TRUE	TRUE	0.0533369	0.774597	large	Q2: 1, 1, 1, 1, 1, 0, 1, 0; Q3: 0, 0, 1, -1, 1, -1, -1, 0
PGT is useful to inform family members about health risks (Q1-Q3), I would recommend PGT to relatives and friends who have not taken the course.	HPI	SoSe 2020	Q2 <> Q3	TRUE	TRUE	0.0533369	0.872872	large	Q2: 1, 0, 1, 1, 1, 1; Q3: 0, -1, -1, 1, -1, -1
I think genetic testing should be allowed without genetic counseling	HPI	SoSe 2020	Q2 <> Q3	TRUE	TRUE	0.0718606	0.707107	large	Q2: 0, -1, 0, 0, 0, 0, -1, -1; Q3: -1, -1, -1, -1, -1, 0, -1, -1
Do you plan to (Q1-Q3) or did you (Q4) conduct analyses with your own data beyond the course? Option: No, I just wanted to receive my data	HPI	SoSe 2021	Q3 <> Q4	TRUE	FALSE	0.0718606	0.816497	large	Q3: -1, -1, -1, -1, -1, -1; Q4: 1, 1, 1, 1, -1, -1
Do you plan to (Q1-Q3) or did you (Q4) conduct analyses with your own data beyond the course? Option: Analyzing genetic ancestry	HPI	SoSe 2021	Q2 <> Q4	TRUE	FALSE	0.0718606	0.894427	large	Q2: 1, 1, 1, 1, -1, NA; Q4: -1, -1, -1, -1, -1, -1
Do you plan to (Q1-Q3) or did you (Q4) conduct analyses with your own data beyond the course? Option: Analyzing genetic ancestry	HPI	SoSe 2021	Q3 <> Q4	TRUE	FALSE	0.0718606	0.816497	large	Q3: 1, 1, 1, 1, -1, -1; Q4: -1, -1, -1, -1, -1, -1
Do you plan to (Q1-Q3) or did you (Q4) conduct analyses with your own data beyond the course? Option: Analyzing wellness traits (not disease-relevant, e.g., eye color or blood type)	HPI	SoSe 2021	Q3 <> Q4	TRUE	FALSE	0.0718606	0.816497	large	Q3: 1, 1, 1, 1, 1, 1; Q4: -1, 1, -1, -1, 1, -1
Do you plan to (Q1-Q3) or did you (Q4) conduct analyses with your own data beyond the course? Option: Analyzing risk of (common) polygenic diseases	HPI	SoSe 2021	Q1 <> Q4	TRUE	FALSE	0.0718606	0.894427	large	Q1: 1, 1, 1, 1, NA, -1; Q4: -1, -1, -1, -1, -1, -1
Do you plan to (Q1-Q3) or did you (Q4) conduct analyses with your own data beyond the course? Option: Analyzing risk of (common) polygenic diseases	HPI	SoSe 2021	Q2 <> Q4	TRUE	FALSE	0.0718606	0.894427	large	Q2: 1, 1, 1, 1, NA, -1; Q4: -1, -1, -1, -1, -1, -1
PGT is useful to inform family members about health risks	HPI	SoSe 2020	Q1 <> Q3	TRUE	TRUE	0.0862756	0.632962	large	Q1: 1, 1, 1, 1, 1, 0, 0, -1; Q3: 0, -1, 1, -1, -1, -1, 1, -1
I think the results from WGS would more likely lead to changes in my future health care decisions than results from array data	HPI	SoSe 2020	Q1 <> Q3	TRUE	TRUE	0.088973	0.801784	large	Q1: 1, 1, 1, 1, NA, -1, NA, -1; Q3: 0, 0, 0, -1, 1, -1, 0, -1
Regarding PGT, I have concerns about privacy	HPI	SoSe 2020	Q1 <> Q3	TRUE	TRUE	0.088973	0.700913	large	Q1: 1, 1, 1, 0, -1, -1, -1, -1; Q3: 0, 0, -1, -1, -1, -1, -1, -1
I get unwanted information from PGT	HPI	SoSe 2020	Q1 <> Q3	TRUE	TRUE	0.088973	0.700913	large	Q1: -1, 0, 0, 0, -1, -1, -1, -1; Q3: 1, 1, 1, 0, 0, -1, -1, -1
I want to (Q1, Q2) or did (Q3, Q4: monogenic) assess my personal disease risk.	HPI	SoSe 2020	Q1 <> Q4	TRUE	TRUE	0.088973	0.944911	large	Q1: 1, 1, 1, 1, 1, 0; Q4: -1, -1, NA, -1, NA, -1
I want to (Q1, Q2) or did (Q3, Q4: polygenic) assess my personal disease risk.	HPI	SoSe 2020	Q1 <> Q4	TRUE	TRUE	0.088973	0.944911	large	Q1: 1, 1, 1, 1, 1, 0; Q4: -1, -1, NA, -1, NA, -1
Do you plan to (Q1-Q3) or did you (Q4) conduct analyses with your own data beyond the course? Option: Carrier detection of risk variants for monogenetic diseases	TUM	WiSe 2020/21	Q2 <> Q4	FALSE	FALSE	0.0909091	0.408815	medium to large	Q2: 1, 1, 1, 1, 1, 1, 1, -1; Q4: 1, 1, -1, -1, -1, -1
Do you plan to (Q1-Q3) or did you (Q4) conduct analyses with your own data beyond the course? Option: Analyzing risk of (common) polygenic diseases	TUM	WiSe 2020/21	Q1 <> Q4	FALSE	FALSE	0.0909091	0.408815	medium to large	Q1: 1, 1, 1, 1, 1, 1, 1, -1; Q4: 1, 1, -1, -1, -1, -1
Please state whether you understood the concept 'the difference between array technology and whole genome sequencing'.	HPI	SoSe 2020	Q1 <> Q3	TRUE	TRUE	0.0946707	0.698884	large	Q1: 1, 1, 1, -1, 1, 0, 0, -1; Q3: 1, 1, 1, 1, 1, 1, 1, 1
Please state whether you understood the concept 'the difference between array technology and whole genome sequencing'.	HPI	SoSe 2020	Q2 <> Q3	TRUE	TRUE	0.0946707	0.698884	large	Q2: -1, 1, 1, 1, 1, 0, 0, -1; Q3: 1, 1, 1, 1, 1, 1, 1, 1
I see this as an opportunity to get information that would help me improve my health and wellbeing	HPI	SoSe 2020	Q1 <> Q3	TRUE	TRUE	0.0946707	0.698884	large	Q1: 1, 1, 1, 1, 1, 1, -1, 0; Q3: 0, 0, 1, -1, 1, -1, -1, 0
